# Supplementary material
Source: publisher site journal article supplement (https://www.spandidos-publications.com/920/downloadSupplementary)
Supplement: Supplementary file 1 [file downloadSupplementary]

## Sheet: Worksheet
Table SIII. Immune cell composition and quantification of the 130 samples.
Input Sample	B cells naive	B cells memory	Plasma cells	T cells CD8	T cells CD4 naive	T cells CD4 memory resting	T cells CD4 memory activated	T cells follicular helper	T cells regulatory (Tregs)	T cells gamma delta	NK cells resting	NK cells activated	Monocytes	Macrophages M0	Macrophages M1	Macrophages M2	Dendritic cells resting	Dendritic cells activated	Mast cells resting	Mast cells activated	Eosinophils	Neutrophils	P-value	Pearson Correlation	RMSE
R01_003	0.232047	0	0.0889728	0	0	0.204517	0.0874862	0	0	0	0.116919	0	0	0	0	0.0802972	0.0652888	0.0817296	0	0.0162494	0	0.0264932	0.95	-0.0461	1.08719
R01_006	0.31494	0	0.191157	0	0.0006	0.198012	0	0.0485536	0	0	0.00922395	0.00835584	0	0	0.0146117	0.212771	0	0	0	0	0.00180902	0	0.24	0.0786474	1.04689
R01_012	0.226397	0	0.0847598	0	0	0.200925	0	0.0210205	0	0	0	0.0425857	0	0	0	0.165125	0.034746	0.0908802	0.0589882	0	0.0431674	0.0314053	0.32	0.0523561	1.04447
R01_013	0	0.113241	0.031647	0.0131111	0	0.236955	0	0	0.0241082	0	0	0.0448672	0.0259389	0	0	0.288604	0	0.190064	0.0146461	0	0	0.016817	0.77	-0.0264	1.09299
R01_014	0	0.100248	0.0216223	0	0.0864972	0.327305	0	0	0	0	0	0.0642323	0	0	0	0.150814	0	0.0327541	0.189493	0	0.0270353	0	0.63	-0.0101	1.08579
R01_016	0.220602	0	0.206985	0	0	0.155576	0	0.0546754	0	0	0	0.0489822	0.0317573	0.0577561	0.0636014	0	0.0691865	0.0670401	0.0238381	0	0	0	0.54	0.00343803	1.06283
R01_017	0.158001	0	0.102427	0	0.200018	0.29235	0	0	0	0.0635158	0.0485395	0	0.00267566	0.0405344	0	0	0	0.0260999	0	0	0.0658386	0	0.95	-0.0476	1.12699
R01_021	0.275892	0	0.0359499	0.0155819	0	0.0211058	0	0	0.148666	0	0.0183412	0	0	0.0345174	0	0.0602365	0	0.159727	0.128723	0	0.0896028	0.0116569	0.99	-0.0634	1.09737
R01_022	0.217349	0.059004	0.0635699	0.0136649	0	0.123631	0	0.0963132	0	0	0.0700782	0	0.0120832	0	0	0.0519506	0	0.0424014	0.0773487	0	0.172605	0	0.94	-0.041	1.0851
R01_023	0	0.226882	0.0236714	0	0.300677	0.289701	0	0	0.0314126	0	0.00942271	0.030866	0	0	0.00273213	0	0	0.0169621	0	0	0.0676727	0	0.31	0.0568033	1.10156
R01_024	0.307468	0	0.127529	0	0	0.12922	0	0.0512387	0	0	0	0.069952	0.0335942	0.0102312	0.00356458	0	0	0.15852	0	0.0498334	0.0588487	0	0.38	0.0458832	1.06449
R01_026	0.158406	0	0.0296346	0.100813	0	0.200549	0.0666486	0.0579266	0.0667579	0	0.0530733	0	0.0607712	0.0706993	0	0	0.0198951	0.0260266	0	0.0149894	0.0738086	0	0.89	-0.0348	1.09499
R01_028	0.185127	0	0.0918267	0.0964667	0	0.150937	0	0	0	0	0	0.0693428	0	0	0.0260265	0.261962	0	0.0149483	0	0.0133364	0.031029	0.0589975	0.94	-0.0415	1.08874
R01_032	0.191754	0	0.0229464	0	0	0.12118	0.0777885	0.0443005	0	0.100181	0	0	0	0.112988	0.0184158	0.134986	0.0660213	0.00327649	0.0816942	0	0.0244677	0	0.05	0.169745	1.00558
R01_034	0.259309	0	0.0282943	0	0.0137595	0.192206	0	0	0.0175403	0	0.0467693	0.0197837	0.0178752	0	0	0.253157	0.0951824	0	0.0561228	0	0	0	1	-0.0693	1.09999
R01_037	0.108955	0	0.215695	0.0397137	0	0.107115	0.0301356	0.055403	0	0.0177266	0	0.0267841	0	0	0.0919345	0.200401	0.0698163	0	0.0300419	0	0	0.00627912	0.2	0.0930089	1.02806
R01_038	0.158333	0	0.243521	0	0.0269558	0.181474	0.0308637	0	0	0	0.0446695	0.00511554	0	0.0261615	0.0895908	0.0835871	0	0	0.0825915	0	0.0271369	0	0.07	0.153335	1.00766
R01_041	0.296252	0	0.0915134	0	0	0.19801	0	0.0304873	0	0	0.124654	0	0	0.0854682	0	0	0.0846283	0	0	0.0889869	0	0	0.99	-0.0645	1.10867
R01_043	0.157454	0	0.0524009	0.0424229	0	0.1838	0	0.129599	0	0	0	0.0581594	0.0431315	0	0.0379906	0.155985	0.0005	0.0401171	0.0490629	0	0	0.0493812	0.43	0.029949	1.05887
R01_048	0.0518092	0	0.586985	0	0.0762732	0.143741	0.0124064	0	0	0	0.0331393	0	0	0.0458348	0.0422304	0.00758065	0	0	0	0	0	0	0.04	0.17804	1.014
R01_049	0.185595	0	0.111821	0	0.0168915	0.214453	0.00294564	0.03347	0	0	0.148159	0	0	0	0.0160341	0.105436	0.0449008	0	0	0.0674799	0.0528149	0	0.99	-0.0645	1.09805
R01_054	0.512376	0	0.0615503	0	0	0.0837971	0	0	0.081719	0	0.0848595	0	0	0	0.0007	0	0.134679	0	0	0.00456994	0	0.0357097	1	-0.0807	1.14761
R01_056	0.209771	0	0.185089	0.0118151	0	0.0814	0.00389273	0	0.00384639	0	0	0.00126865	0.0176852	0.0665459	0.0458846	0.1452	0.218399	0	0.00325204	0	0	0.00594941	0.02	0.290483	0.960493
R01_057	0.174797	0	0.00413732	0.0210413	0	0.100951	0	0.017116	0	0	0	0.105032	0.00641507	0.018374	0	0.176061	0	0.138373	0.109088	0	0.123132	0.00548224	0.18	0.0957571	1.04084
R01_059	0	0.142017	0	0.00455899	0	0.0821351	0	0.103027	0	0	0.0220685	0	0.00193348	0	0.0537991	0.206172	0.160032	0.106364	0.0004	0	0.0881659	0.0293328	0.26	0.0650418	1.05131
R01_060	0.247715	0	0	0	0	0.147534	0	0	0	0	0	0.0513172	0.00821348	0.0170622	0	0.233939	0	0.105382	0.122313	0	0.0439818	0.0225425	0.69	-0.0166	1.08059
R01_061	0.0735127	0	0.283631	0.022919	0	0.0776685	0	0.0171695	0.00876035	0.0430745	0	0.0261966	0	0.264049	0.0687482	0.114271	0	0	0	0	0	0	0	0.471318	0.882124
R01_062	0.215139	0	0.0618819	0	0.0226867	0.0859236	0.0340688	0.00597077	0.0236659	0	0.107671	0	0.00694467	0.050277	0.179078	0.191592	0.0002	0	0.00392002	0.0109854	0	0	0.02	0.306515	0.964667
R01_063	0	0.030185	0.128153	0	0	0.106539	0	0.028371	0	0	0	0.0490159	0	0	0.0554579	0.224221	0.323258	0	0	0	0.0413419	0.0134573	0.04	0.178646	1.00906
R01_064	0.0851894	0	0.00938839	0.0421991	0	0.211168	0	0	0	0	0.212175	0	0.0769042	0	0	0.0460998	0	0.066023	0	0.0461943	0.155878	0.0487808	0.69	-0.0175	1.10717
R01_066	0.0953122	0	0.0221914	0	0.230352	0	0	0.0496557	0	0	0.218603	0	0.0177955	0.0133718	0.00374308	0.336896	0.00832836	0	0	0	0	0.00375147	1	-0.0934	1.13892
R01_067	0.109202	0	0.0286974	0.127371	0	0.0668983	0.00172686	0.0250044	0.00406307	0	0	0.0601977	0.00727768	0.0362096	0.0984869	0.217972	0.0743584	0	0.119175	0	0.00399362	0.019365	0.02	0.279181	0.966306
R01_068	0.0243494	0	0.110581	0	0	0.258832	0	0.00550903	0	0	0	0.0437207	0	0	0.0501324	0.18097	0.21262	0.0216044	0.073634	0	0	0.0180464	0.04	0.199001	0.992588
R01_069	0.3744	0	0.0008	0.116815	0	0.219769	0	0	0	0	0	0.0887305	0.0433816	0	0.0878421	0	0.0481789	0.015582	0.0007	0	0	0.00386583	0.99	-0.0631	1.14685
R01_072	0.0439142	0	0.116137	0.0484995	0	0.235635	0	0.0217995	0	0	0	0.027625	0	0	0.0710067	0.164544	0.172464	0.0245388	0.0427353	0	0	0.0311008	0.04	0.212545	0.98779
R01_073	0.127865	0	0.163664	0	0	0.375807	0	0.111059	0	0	0.0166197	0.0222416	0	0.0104724	0	0	0	0.113302	0	0	0.0589689	0	0.44	0.0289418	1.07721
R01_076	0.121118	0	0	0	0.0648597	0.198977	0	0	0	0	0	0.00342107	0.0074413	0	0	0.281983	0	0.0121301	0.151879	0	0.158191	0	0.57	0.00113884	1.07543
R01_078	0.133055	0	0.534969	0	0.0267417	0.143031	0.0008	0.0243206	0	0	0.0253255	0	0	0.024304	0.0653366	0.0220816	0	0	0	0	0	0	0.1	0.129593	1.03056
R01_079	0.156514	0	0	0	0	0.182941	0	0.0783891	0	0	0	0.032184	0	0.0448627	0.0007	0.162541	0	0.242729	0.0156011	0	0.0835816	0	1	-0.0692	1.11867
R01_080	0.169765	0	0.0667703	0.0254853	0	0.0858006	0	0.0131125	0.00680498	0	0	0.0728247	0.0274277	0	0	0.156523	0.0888473	0	0.239406	0	0.0294672	0.0177649	0.51	0.00842219	1.06792
R01_081	0.106716	0	0.114862	0	0	0.246381	0	0	0.0209325	0.0147318	0	0.0192348	0	0	0.0255625	0.12246	0	0.139245	0.183136	0	0	0.0067386	0.26	0.0656157	1.0443
R01_084	0	0.226447	0.0727168	0.0342755	0	0	0	0.308546	0	0	0.0664426	0.0139878	0.0141079	0	0	0.0835201	0	0.0751355	0	0.0865772	0.018243	0	0.53	0.00685899	1.07565
R01_089	0.208689	0	0.0259523	0	0.0350778	0.0727124	0.0980817	0	0	0.167628	0	0.0116303	0	0.0264896	0.0382851	0.0832209	0	0.0177503	0.12617	0	0.0788103	0.00950301	0.92	-0.0384	1.08739
R01_091	0.145479	0	0.0448021	0	0.083858	0.266733	0.0242624	0	0	0	0.172812	0	0	0.0001	0.140881	0.0923203	0.00159088	0	0.0186251	0	0	0.00849659	0.21	0.0890546	1.07193
R01_094	0.10988	0	0.0401809	0	0.111528	0.059648	0	0	0.0628009	0	0.0571949	0.0116278	0.0112399	0.075426	0.00957909	0.210747	0.0149956	0.0497341	0.0623308	0	0.113087	0	0.04	0.175165	1.00291
R01_098	0.118627	0	0	0	0	0.212084	0	0	0.212455	0	0	0.108894	0.0604704	0	0	0.131879	0	0.0468868	0.0121382	0	0.0965646	0	1	-0.0672	1.11064
R01_099	0.0950318	0	0.0805036	0	0.237799	0	0	0	0.0692224	0.0453106	0	0	0	0.00760495	0	0.238692	0.0832583	0.0479016	0.0592099	0	0.0163134	0.0191521	0.68	-0.0148	1.07119
R01_100	0.128373	0	0.362999	0	0	0.138798	0.0112334	0	0	0.023682	0	0	0	0	0	0.265443	0	0.0379603	0	0	0	0.0315116	0.18	0.0968989	1.02931
R01_101	0.16127	0	0.128393	0	0	0.377805	0	0	0	0	0	0.0860218	0	0.0355167	0.0166097	0	0.0341673	0.0285888	0.129251	0	0	0.0023765	0.86	-0.0325	1.09117
R01_102	0.126313	0	0.109367	0	0.19972	0.183923	0	0	0.0249987	0	0.0123665	0.0619098	0	0	0.0156307	0.131555	0	0	0.134216	0	0	0	0.89	-0.0355	1.0903
R01_104	0.339702	0	0.0561558	0	0.201194	0.0794781	0.0563035	0	0	0	0	0	0.0162886	0.0009	0	0.105784	0	0.0236199	0.107434	0	0	0.0131844	0.84	-0.0316	1.09779
R01_105	0.0148123	0	0.075293	0	0.102721	0.137851	0	0	0	0	0.0881635	0	0	0	0.0226585	0.0441309	0	0.111213	0.046428	0	0.0798607	0.276868	0.83	-0.0301	1.11677
R01_107	0.272473	0	0.184989	0.0274943	0	0.0681428	0	0.0302662	0	0.00485418	0	0.079079	0	0	0.0285658	0.145931	0.00903578	0	0.0409454	0.0665304	0.0416935	0	0.9	-0.0365	1.08503
R01_109	0.210595	0	0.0900684	0	0.038584	0.212063	0.0325768	0	0.0585868	0	0	0	0	0.0211757	0.0506542	0.15661	0.077868	0	0.015549	0	0.0314763	0.0041927	0.91	-0.0376	1.07769
R01_110	0.235456	0	0.350768	0	0.110928	0.156193	0.0158743	0	0	0	0.0609274	0	0	0.0116139	0.0226131	0.0207091	0	0	0.00856234	0	0.00635394	0	0.53	0.00725562	1.07471
R01_111	0.214951	0	0.0494409	0	0	0.236327	0.0624579	0.052194	0.0204735	0	0	0	0.0255101	0	0	0.0726972	0.0696059	0.091	0.0122585	0	0.093084	0	0.88	-0.0342	1.07807
R01_112	0.121941	0	0.302682	0.00232699	0	0.149681	0	0	0.0023172	0	0	0.0441498	0	0.038533	0.100975	0.0790532	0.0386062	0	0	0.03498	0.0797119	0.00504388	0.81	-0.0282	1.07329
R01_113	0.224492	0	0.0153774	0.0860794	0	0	0	0.0482968	0	0.0494838	0	0.0687808	0	0	0.0804281	0.229234	0.00152409	0.00452542	0.130098	0	0.0616814	0	0.79	-0.0275	1.09089
R01_114	0.208153	0	0.192294	0	0	0.181525	0	0.0491108	0	0	0	0.0508085	0	0.0268193	0.0731791	0.0695286	0.0241806	0	0.109929	0	0.00163178	0.0128403	0.91	-0.0371	1.07412
R01_115	0.248748	0	0.0339929	0	0.157171	0.144246	0	0	0.0005	0	0	0.0968502	0	0.0713456	0.0737305	0.101627	0	0	0.0504588	0	0	0.0213198	0.9	-0.0365	1.10113
R01_116	0.208101	0	0.147647	0	0.0487245	0.22195	0	0	0	0	0.0153481	0.0255318	0	0	0.00609748	0.116102	0.071222	0.0209792	0.0355575	0	0.0766165	0.00612245	0.91	-0.0376	1.07287
R01_117	0.158895	0	0.0836371	0	0.0863697	0	0	0.0903777	0	0	0.00738226	0.0143431	0.0519867	0	0	0.256636	0	0.1955	0.0548727	0	0	0	0.84	-0.0304	1.08504
R01_118	0.151509	0	0.190324	0.0292096	0.062599	0.0512674	0.0784843	0	0	0	0.0609064	0	0.00203795	0.0732987	0	0.116658	0	0.04783	0.0912455	0	0.0446306	0	0.94	-0.0392	1.06416
R01_120	0.118308	0	0.14535	0.0125391	0.00938044	0.0876685	0.0362902	0	0	0	0.0758151	0	0	0	0	0.0968574	0	0.125985	0.0206264	0.0149686	0.162491	0.0937206	0.89	-0.0356	1.0756
R01_121	0.151571	0	0.232755	0	0	0.243666	0	0	0.0125432	0	0	0.0209414	0	0.0376796	0.0543074	0	0.0805369	0	0	0.0250902	0.0321708	0.108738	0.92	-0.038	1.07427
R01_122	0.156409	0	0.351503	0	0.118276	0.171131	0.00529413	0	0	0	0.00817366	0.00324169	0.0101011	0	0.01405	0.0762113	0	0	0.0856084	0	0	0	0.87	-0.0328	1.07659
R01_123	0.081163	0	0.0188707	0	0.0906216	0.203238	0	0	0	0	0	0.119655	0.0297752	0	0	0.129576	0	0.0578804	0.176229	0	0.0876969	0.00529376	0.9	-0.0362	1.09254
R01_125	0.192404	0	0.0681104	0	0.375372	0	0	0.00439605	0.159665	0	0	0	0	0	0	0	0.012121	0	0	0	0.187932	0	0.83	-0.03	1.12122
R01_126	0.109738	0	0.0663104	0	0.0398337	0.419227	0	0	0.0341939	0	0	0.00372493	0.072214	0.0630564	0	0.0435831	0.0381975	0.0150588	0.0723701	0	0.0224921	0	0.89	-0.0349	1.09354
R01_127	0.142257	0	0.0675701	0	0	0.191828	0.0202148	0.0263182	0	0.0574276	0	0	0	0.015153	0	0.163017	0	0.115821	0.139596	0	0.0607973	0	0.89	-0.0361	1.07421
R01_128	0.199221	0	0.0773563	0	0	0.212533	0	0.00811911	0.001298	0	0.0869792	0	0	0	0	0.191198	0.0144521	0.089308	0.0728372	0	0.0114915	0.0352072	0.91	-0.0372	1.07681
R01_130	0.113372	0	0.0669798	0	0.174101	0.0812475	0	0	0.0292666	0	0.105508	0	0	0	0.0455238	0.217727	0.0511207	0.0144019	0.0519031	0	0.0488475	0	0.94	-0.0393	1.07979
R01_131	0.294559	0	0.00495922	0	0	0.301827	0.0471013	0	0.0903578	0	0	0.0364502	0.0302511	0.0428553	0.0260477	0.00817544	0	0.024448	0.085038	0	0.00793013	0	0.86	-0.0326	1.10142
R01_132	0.16108	0	0.35515	0.00170256	0	0.0534224	0	0.0680258	0	0	0	0.0843814	0	0	0.0208984	0.0944964	0.022093	0.00134402	0.0812842	0	0.0495964	0.0065249	0.94	-0.0406	1.07219
R01_133	0.00637138	0.152077	0.15128	0.138548	0	0.0718201	0	0	0	0.0255161	0.0160184	0.0218846	0.113956	0.0481651	0.0361894	0	0.0581124	0.06444	0.0393211	0.0460778	0.0004	0.00984667	0.91	-0.0375	1.07263
R01_134	0.175533	0	0.373417	0.0586758	0	0.0166354	0	0.0480291	0	0.0006	0	0.0155801	0	0	0.0715552	0.14538	0	0.00238582	0	0.0276551	0.0449194	0.0196596	0.88	-0.0339	1.0753
R01_136	0.215089	0	0.00351588	0	0.155504	0.281235	0.0792559	0	0	0	0.0148583	0	0	0.0114618	0	0.104164	0	0	0.0591978	0	0.0117219	0.0639958	0.88	-0.0337	1.10517
R01_137	0	0.221564	0.0923286	0	0.0680851	0.20084	0	0	0	0	0.0507353	0.00724251	0.0554321	0.0100293	0.0023911	0.0715536	0.0950256	0.0041248	0.0981651	0	0.0224833	0	0.94	-0.0394	1.07074
R01_138	0.173674	0	0.303946	0.00343877	0.0857563	0.159203	0.0242413	0	0	0	0.0453464	0	0	0	0.0148092	0.0152376	0.0155402	0	0.109102	0	0.0366684	0.013037	0.89	-0.0346	1.07441
R01_140	0.253629	0	0.0922498	0.0727375	0.0151581	0	0.142947	0	0	0	0	0	0.053196	0.123031	0	0.0325724	0	0.0464557	0.0556975	0	0.112325	0	0.91	-0.0373	1.07488
R01_141	0.502307	0.00489499	0	0	0.0998319	0	0	0.0005	0.114063	0.122505	0	0	0	0.0313221	0.0809653	0.0392337	0	0	0.0043721	0	0	0	0.76	-0.0246	1.1413
R01_142	0.0997667	0	0.0592776	0	0.09147	0.231377	0	0	0.0772604	0	0.107874	0	0	0	0	0.130187	0.0213169	0.0286083	0.0576004	0.0185884	0.0436952	0.032979	0.91	-0.0375	1.08806
R01_144	0.0789604	0	0	0	0	0.229748	0.0192043	0.0251015	0.0268328	0	0.0467121	0.00821971	0	0	0	0.143974	0.13602	0.00936293	0.0937808	0	0.131378	0.0507058	0.94	-0.0417	1.07973
R01_147	0.209961	0	0	0	0	0.239852	0	0	0.0216435	0	0	0.0515238	0.0332909	0	0	0.255734	0	0.038624	0.0604903	0	0	0.0888807	1	-0.077	1.10537
R01_149	0.431649	0	0.0735657	0	0	0.247514	0	0	0.0746653	0	0	0.0928676	0	0.0797381	0	0	0	0	0	0	0	0	1	-0.0939	1.15484
R01_151	0.228432	0	0	0	0.00875984	0.422809	0	0.0399774	0	0	0.051132	0.00687274	0	0	0	0.141219	0	0.100798	0	0	0	0	0.98	-0.0561	1.12483
R01_152	0.0753809	0	0.168254	0	0.0895392	0.179769	0.0244965	0	0	0	0.00915185	0.0504518	0.0149214	0.104726	0.0370608	0.136699	0	0	0.0896168	0	0	0.0199333	0.31	0.0543304	1.04237
R01_154	0.070786	0	0.00489031	0.0129158	0	0.237817	0	0.010343	0	0	0	0.0957416	0.0328709	0	0	0.195022	0.0438575	0.0631183	0.0643138	0	0.125451	0.0428731	0.41	0.0394408	1.05927
R01_160	0.155504	0	0.0477681	0.00882095	0	0.190556	0	0.0375325	0.00317645	0	0.203188	0	0.00166928	0	0.0757072	0.0946066	0.0713418	0	0	0.0899462	0.0201835	0	1	-0.0939	1.13001
R01_004	0.0617725	0	0.234876	0	0	0.0222106	0.0173429	0.140857	0	0.132421	0	0.011391	0	0.0711508	0.132928	0.0763042	0.0375132	0.00110704	0.0425052	0	0	0.0176201	0.03	0.214697	0.99176
R01_005	0.323878	0	0.192132	0	0	0.298985	0	0.0123592	0	0	0	0.0587321	0.0183287	0.010748	0	0	0	0.056566	0.0282721	0	0	0	0.99	-0.0619	1.11092
R01_007	0.126738	0	0.0340575	0.156035	0	0.234818	0.118519	0	0.00172577	0	0.0122431	0.00702854	0.00820297	0.00312336	0.14226	0.011316	0.122366	0	0.0215666	0	0	0	0.08	0.142949	1.03589
R01_015	0.18279	0	0.216631	0.00262916	0.00254073	0.14937	0.0183878	0	0	0.01043	0	0.0294436	0.0229176	0.0244255	0.0115359	0.14929	0.133636	0	0.0181725	0	0.00959086	0.0182082	0.1	0.124075	1.01502
R01_018	0.303702	0	0.244899	0	0	0.274673	0.0137503	0	0	0	0.0466974	0	0.00371357	0.109628	0	0	0	0	0	0	0.00293769	0	1	-0.0904	1.11591
R01_027	0.0804342	0	0.0010925	0.101395	0	0.1473	0.0131725	0	0	0	0.0995885	0	0	0.0127608	0.0200761	0.206543	0.135762	0	0	0.166582	0	0.0152939	0.26	0.0664299	1.06476
R01_029	0.266381	0	0	0	0.191965	0	0	0	0	0	0.205483	0	0	0	0	0	0.10354	0	0	0.205554	0.0270757	0	1	-0.0725	1.15231
R01_031	0.357051	0	0.164015	0	0	0.166896	0.050252	0.0230063	0	0	0.0174852	0	0	0.0665758	0	0.103811	0.0188665	0	0	0	0.00143486	0.0306061	0.33	0.048998	1.05944
R01_033	0.358021	0	0	0.00107532	0	0.258602	0	0.0103695	0	0	0	0.10951	0	0.1143	0	0	0.00353734	0	0.144585	0	0	0	0.97	-0.0513	1.12446
R01_035	0	0.101825	0.501437	0	0	0.186118	0	0	0	0	0.0357111	0	0	0	0.010022	0.0503867	0.0553247	0	0	0.0125747	0.0429401	0.00365951	0.22	0.0847426	1.03794
R01_039	0.0838412	0	0.2547	0	0.0491109	0.101044	0	0	0	0	0.0606435	0	0.0643698	0.0347596	0.0149667	0.116192	0	0	0.220372	0	0	0	0.16	0.107207	1.02393
R01_040	0.246095	0.0559553	0.088252	0	0.25322	0.223756	0.0132591	0	0	0	0	0.00120773	0.00389479	0	0	0.11399	0	0	0.0004	0	0	0	0.04	0.187133	1.02397
R01_042	0.212542	0	0.309951	0	0	0.144174	0	0.0281519	0	0	0.00514377	0	0	0.0371051	0.0409054	0.10544	0	0.0272754	0.0351441	0.012567	0.0416003	0	0.31	0.0557957	1.04067
R01_046	0.16278	0	0.365899	0	0	0.127514	0.0202396	0	0	0	0.0475587	0	0	0.0014091	0.0214022	0.147605	0.0572134	0	0.0285116	0.0198679	0	0	0.13	0.116782	1.01863
R01_051	0.216574	0	0.184673	0	0	0.231335	0	0.019765	0	0	0.0863038	0	0.0334545	0.0093735	0	0.0301315	0	0.0794471	0	0.0475416	0.0614009	0	0.61	-0.0052	1.06862
R01_052	0.0390177	0	0.072316	0	0.0684894	0.0639219	0	0.0490995	0.0848729	0	0.0117197	0.106616	0.0168695	0	0	0.0115399	0	0.0338742	0.13986	0	0.111003	0.190801	0.89	-0.0351	1.10153
R01_055	0.0396041	0.0496404	0.152969	0	0	0.106665	0.0633201	0.124353	0	0	0.0806476	0	0	0	0	0.0994651	0	0.08256	0.00988612	0.104271	0.0866186	0	0.73	-0.0208	1.06935
R01_065	0.253747	0	0.112502	0	0.0969443	0.226828	0	0.00453639	0.188618	0	0.0266728	0	0	0	0	0	0.0672812	0	0.0003	0	0	0.0225981	1	-0.0789	1.12907
R01_071	0.411171	0	0	0	0	0.279874	0	0	0	0	0	0.197582	0	0.0118953	0	0	0	0	0.0635881	0	0	0.0358897	0.89	-0.0344	1.15787
R01_077	0.308212	0	0.11473	0	0	0.20759	0.00323255	0	0	0	0.0949112	0	0.0206589	0.01256	0	0.111834	0	0.0382376	0	0.0310431	0.0261314	0.0308587	0.71	-0.0189	1.08226
R01_083	0	0.295784	0.346472	0	0.0712922	0.130108	0.0385097	0	0	0	0	0.0169673	0	0.0251965	0.0298221	0.0248804	0	0.00589709	0.00679755	0	0.00827252	0	0.03	0.258256	0.974989
R01_093	0.0824721	0	0.404101	0.00577008	0.0669292	0.203673	0	0	0	0	0	0.0722882	0.0004	0.147819	0	0.0165036	0	0	0	0	0	0	0.38	0.0434298	1.05876
R01_096	0.115479	0	0.132584	0	0	0.166749	0	0.0222266	0	0	0.0521282	0.0070089	0.0277805	0	0.0518327	0.310125	0	0.0457181	0.0432157	0	0	0.0251521	0.03	0.261458	0.970007
R01_097	0	0.193353	0	0	0.125586	0.108486	0	0.0439596	0	0	0.136837	0	0	0.159691	0	0.18629	0	0.0315952	0	0.0142023	0	0	1	-0.1016	1.12939
R01_103	0.0358425	0	0.061235	0.104704	0	0	0.0664709	0	0.140089	0.0948399	0	0	0	0.00842843	0.0935015	0.224286	0.0110321	0.0050707	0	0.0111159	0.143384	0	0.91	-0.0376	1.09073
R01_106	0.0871614	0	0.302554	0	0	0.0858056	0	0.047247	0	0	0.0092709	0.0470967	0	0.163016	0.0211322	0.0852059	0.020779	0	0	0.0680754	0	0.0626556	0.9	-0.0363	1.0822
R01_108	0.182748	0	0.0881061	0.051221	0	0.134245	0	0.0921801	0	0	0	0.0661656	0	0.0004	0.0563405	0.165975	0.0799931	0	0.0581557	0	0	0.0244973	0.94	-0.0406	1.07759
R01_119	0.319054	0	0.11639	0.0744537	0	0.0189448	0	0	0.111341	0.00598291	0.0383614	0	0	0.226873	0.00635999	0	0.00542487	0.0017299	0	0.00825599	0.0634561	0.00337315	0.87	-0.0333	1.09961
R01_124	0.207632	0	0.0982143	0	0	0	0	0.0106013	0.0911483	0	0.0468773	0.0237017	0	0	0.0608706	0	0.329285	0	0	0.0716357	0.060034	0	0.9	-0.0365	1.08226
R01_129	0.0485095	0	0.0322546	0	0.188936	0	0.0213759	0	0.0738612	0.0474676	0.0848263	0	0	0	0.110692	0.248675	0.0559321	0.0206321	0.0160797	0	0.0182559	0.0325021	0.86	-0.0321	1.09659
R01_135	0.120602	0	0.103338	0.0585789	0	0	0.045274	0.0744955	0.111625	0	0	0	0	0	0	0.304568	0.114971	0	0	0	0.0665467	0	0.94	-0.0392	1.08076
R01_139	0.076797	0	0.218584	0	0.028367	0.224638	0	0	0	0	0.0563881	0	0	0	0.102205	0.0732736	0.118407	0	0.0712771	0	0	0.0300627	0.9	-0.0368	1.07141
R01_145	0.0681697	0	0.284108	0	0	0.199751	0	0	0	0	0	0.0996213	0	0	0.0735094	0.04137	0.150662	0	0.0406617	0	0	0.0421474	0.9	-0.0368	1.07292
R01_146	0	0.100558	0.195314	0	0	0	0	0	0.237484	0	0.10142	0.0659704	0.0351446	0.116269	0.0485036	0.0979948	0	0	0	0.00134149	0	0	0.89	-0.0354	1.08899
R01_148	0.1743	0	0.0322957	0	0	0.15174	0.0273418	0	0.0297912	0	0.00160174	0.0264379	0.0253268	0.062666	0	0.201581	0	0.0434274	0.163395	0	0.0392998	0.0207946	0.04	0.190399	0.997384
R01_150	0.190363	0	0	0.0316836	0	0.212284	0.170291	0.0860555	0	0	0.0828941	0	0.00486627	0	0.0592147	0.0256578	0.108887	0	0.0278038	0	0	0	1	-0.0677	1.10897
R01_153	0.144013	0	0.0477909	0.0753772	0	0.059095	0.00672562	0.0192901	0.0267042	0.0206889	0.0839124	0	0	0.0782466	0.230148	0.154209	0	0	0.0537983	0	0	0	0.01	0.336151	0.958892
R01_156	0.221188	0	0.458451	0	0.118123	0.0972979	0	0	0	0	0	0.0291502	0	0.00846501	0	0.0334687	0.0172486	0	0	0	0.0166075	0	0.68	-0.0154	1.0844
R01_157	0.201307	0	0.0606126	0.0952751	0	0.202047	0	0.116229	0	0	0	0	0.0235082	0.0380192	0.0377932	0	0.0487387	0.00486863	0	0.0827478	0.0888537	0	0.95	-0.0462	1.09559
R01_158	0.113822	0	0.00149968	0.166325	0	0.10291	0	0.0379807	0.0664675	0	0.0181806	0.00278115	0.0414678	0.0539501	0.0316487	0.0942119	0.088431	0	0	0	0.180323	0	0.89	-0.0361	1.08691
R01_159	0.442395	0	0.215607	0	0.0405565	0.214502	0.0454489	0	0	0	0	0	0	0.00467057	0.0161777	0.0206418	0	0	0	0	0	0	0.02	0.286163	0.976094
